# Supplementary material for: A framework for protein structure classification and identification of novel protein structures
Source: Springer Nature journal article supplement (doi:10.1186/1471-2105-7-456), 2006-10-16

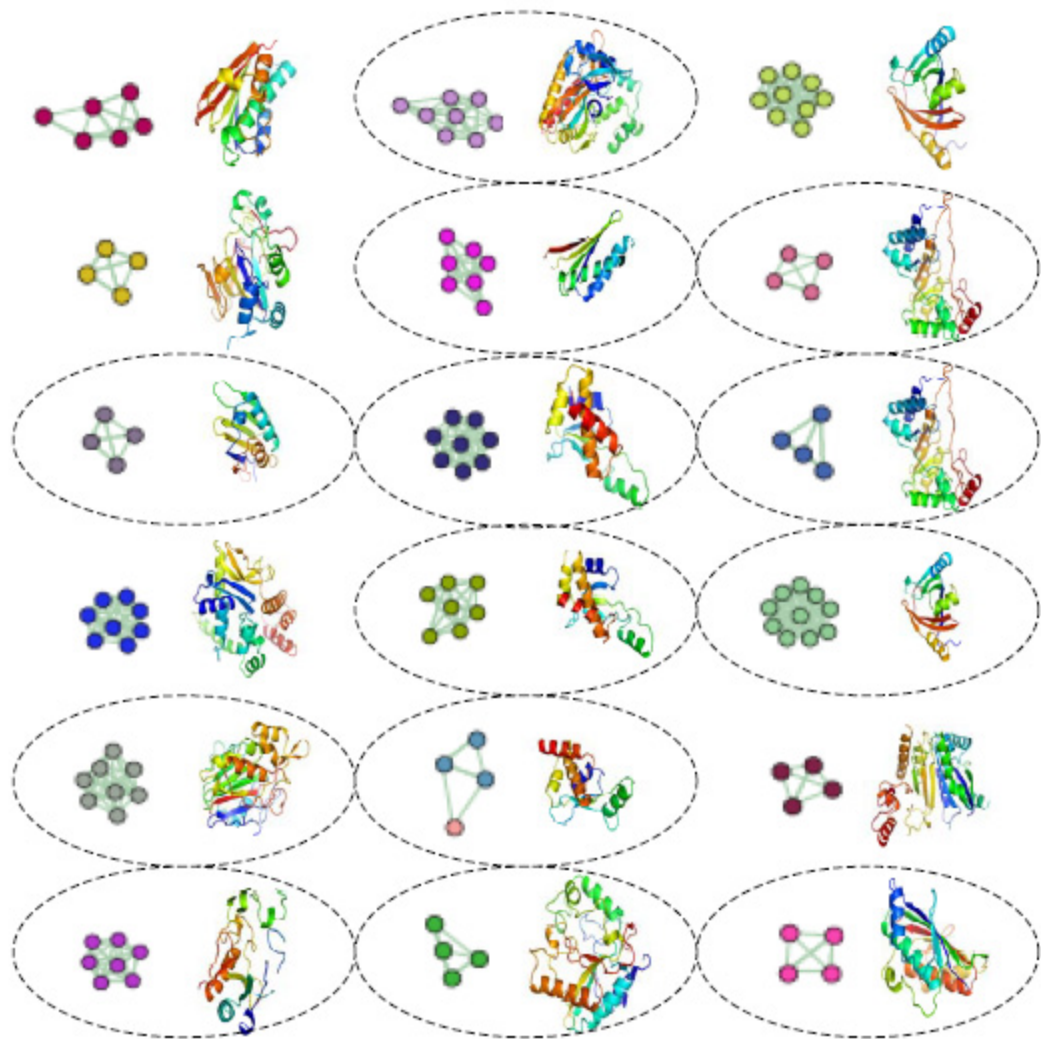

Supplement: 12859_2006_1195_MOESM2_ESM.pdf [file 12859_2006_1195_MOESM2_ESM.pdf]
